# Supplementary material for: Development of Gel-Filter Method for High Enrichment of Low-Molecular Weight Proteins from Serum
Source: PLoS One. 2015 Feb 27;10(2):e0115862. doi: 10.1371/journal.pone.0115862 (PMC4344347; doi:10.1371/journal.pone.0115862)
Supplement: S3 Table — (XLS) [file pone.0115862.s010.xls]

## Sheet: Table S2
Table S3. Quantification of recovery of the spike-in GST protein treated with different approaches.
	Peptide	DFETLK			VDFLSK
Method	Group	Light	Heavy	Light/Heavy	Light	Heavy	Light/Heavy
Optimized-DS	Control	113000000	36120000	3.12846	238000000	78830000	3.01916
	Sample	6314000	12030000	0.524855	12950000	24800000	0.522177
Gel-filter	Control	194000000	72290000	2.68364	217200000	92990000	2.33574
	Sample	42860000	45620000	0.9395	50180000	55080000	0.911038
ProteoMiner	Control	176400000	61050000	2.88943	218200000	79920000	2.73023
	Sample	18220000	54390000	0.334988	17280000	84560000	0.204352
